# Supplementary material
Source: PubMed Central journal article supplement (PMC4827254)
Supplement: NIHMS741012-supplement-4.pdf [file NIHMS741012-supplement-4.pdf]

Table S1: Numbers of animals and nuclei analyzed for DNA content

| Genotype<br>CD<br>Position | wild type        |                 | <i>glp-1</i>     |                 | <i>daf-2</i>     |                 | <i>rsk-1</i>     |                 |
|----------------------------|------------------|-----------------|------------------|-----------------|------------------|-----------------|------------------|-----------------|
|                            | Larval<br>(N=27) | Adult<br>(N=26) | Larval<br>(N=56) | Adult<br>(N=34) | Larval<br>(N=44) | Adult<br>(N=33) | Larval<br>(N=33) | Adult<br>(N=35) |
| 1                          | 63               | 56              | 113              | 65              | 87               | 62              | 34               | 117             |
| 2                          | 78               | 74              | 156              | 80              | 110              | 94              | 62               | 152             |
| 3                          | 76               | 80              | 165              | 116             | 128              | 120             | 82               | 191             |
| 4                          | 80               | 87              | 195              | 125             | 143              | 132             | 95               | 213             |
| 5                          | 82               | 102             | 209              | 133             | 152              | 138             | 98               | 232             |
| 6                          | 102              | 99              | 211              | 127             | 149              | 144             | 101              | 236             |
| 7                          | 110              | 102             | 204              | 161             | 162              | 169             | 117              | 261             |
| 8                          | 95               | 101             | 211              | 147             | 164              | 164             | 110              | 243             |
| 9                          | 108              | 107             | 191              | 142             | 163              | 155             | 111              | 275             |
| 10                         | 112              | 111             | 169              | 147             | 175              | 154             | 112              | 255             |
| 11                         | 104              | 103             | 134              | 143             | 175              | 152             | 113              | 243             |
| 12                         | 105              | 93              | 80               | 136             | 168              | 165             | 115              | 203             |
| 13                         | 76               | 99              | 30               | 119             | 155              | 164             | 105              | 190             |
| 14                         | 75               | 94              | 14               | 88              | 143              | 144             | 107              | 126             |
| 15                         | 75               | 89              | 8                | 51              | 111              | 130             | 96               | 81              |
| 16                         | 40               | 85              | 0                | 41              | 95               | 124             | 89               | 66              |
| 17                         | 34               | 86              | 0                | 29              | 67               | 104             | 48               | 44              |
| 18                         | 31               | 57              | 0                | 21              | 51               | 74              | 30               | 24              |
| 19                         | 23               | 72              | 0                | 19              | 42               | 44              | 22               | 5               |
| 20                         | 20               | 68              | 0                | 6               | 29               | 30              | 11               | 0               |
| 21                         | 21               | 62              | 0                | 3               | 9                | 21              | 7                | 0               |
| 22                         | 10               | 36              | 0                | 0               | 8                | 14              | 2                | 0               |
| 23                         | 4                | 33              | 0                | 0               | 1                | 14              | 0                | 0               |
| 24                         | 0                | 24              | 0                | 0               | 0                | 11              | 0                | 0               |
| 25                         | 0                | 20              | 0                | 0               | 0                | 7               | 0                | 0               |
| Total (n)                  | 1,524            | 1,940           | 2090             | 1899            | 2,487            | 2,530           | 1,667            | 3,157           |

N = number of animals

n = number of nuclei

Table S2: Proportions of nuclei with Low, Mid and High DNA Content, pooled from all animals by CD

|              | Distance in CD from distal tip | Larval |       |       |     | Adult |       |       |     |
|--------------|--------------------------------|--------|-------|-------|-----|-------|-------|-------|-----|
|              |                                | Low    | Mid   | High  | n   | Low   | Mid   | High  | n   |
| wild type    | 1                              | 33.33  | 41.27 | 25.40 | 63  | 42.86 | 41.07 | 16.07 | 56  |
|              | 2                              | 32.05  | 47.44 | 20.51 | 78  | 33.78 | 50.00 | 16.22 | 74  |
|              | 3                              | 44.74  | 27.63 | 27.63 | 76  | 28.75 | 53.75 | 17.50 | 80  |
|              | 4                              | 33.75  | 40.00 | 26.25 | 80  | 21.84 | 58.62 | 19.54 | 87  |
|              | 5                              | 20.73  | 46.34 | 32.93 | 82  | 37.25 | 43.14 | 19.61 | 102 |
|              | 6                              | 29.41  | 43.14 | 27.45 | 102 | 19.19 | 55.56 | 25.25 | 99  |
|              | 7                              | 30.00  | 49.09 | 20.91 | 110 | 24.51 | 39.22 | 36.27 | 102 |
|              | 8                              | 32.63  | 48.42 | 18.95 | 95  | 14.85 | 54.46 | 30.69 | 101 |
|              | 9                              | 31.48  | 42.59 | 25.93 | 108 | 18.69 | 49.53 | 31.78 | 107 |
|              | 10                             | 34.82  | 36.61 | 28.57 | 112 | 20.72 | 47.75 | 31.53 | 111 |
|              | 11                             | 34.62  | 41.35 | 24.04 | 104 | 18.45 | 47.57 | 33.98 | 103 |
|              | 12                             | 30.48  | 39.05 | 30.48 | 105 | 26.88 | 39.78 | 33.33 | 93  |
|              | 13                             | 31.58  | 40.79 | 27.63 | 76  | 15.15 | 56.57 | 28.28 | 99  |
|              | 14                             | 28.00  | 38.67 | 33.33 | 75  | 9.57  | 60.64 | 29.79 | 94  |
|              | 15                             | 22.67  | 40.00 | 37.33 | 75  | 19.10 | 42.70 | 38.20 | 89  |
|              | 16                             | 32.50  | 32.50 | 35.00 | 40  | 12.94 | 38.82 | 48.24 | 85  |
|              | 17                             | 32.35  | 35.29 | 32.35 | 34  | 20.93 | 33.72 | 45.35 | 86  |
|              | 18                             | 45.16  | 51.61 | 3.23  | 31  | 19.30 | 36.84 | 43.86 | 57  |
|              | 19                             | 26.09  | 60.87 | 13.04 | 23  | 19.44 | 41.67 | 38.89 | 72  |
|              | 20                             | 35.00  | 50.00 | 15.00 | 20  | 20.59 | 42.65 | 36.76 | 68  |
|              | 21                             | 33.33  | 52.38 | 14.29 | 21  | 11.29 | 33.87 | 54.84 | 62  |
|              | 22                             | 0.00   | 0.00  | 0.00  | 10  | 25.00 | 27.78 | 47.22 | 36  |
|              | 23                             | 0.00   | 0.00  | 0.00  | 4   | 15.15 | 24.24 | 60.61 | 33  |
|              | 24                             | 0.00   | 0.00  | 0.00  | 0   | 4.17  | 37.50 | 58.33 | 24  |
|              | 25                             | 0.00   | 0.00  | 0.00  | 0   | 10.00 | 25.00 | 65.00 | 20  |
| <i>glp-1</i> | 1                              | 38.05  | 48.67 | 13.27 | 113 | 47.69 | 32.31 | 20.00 | 65  |
|              | 2                              | 28.85  | 44.87 | 26.28 | 156 | 37.50 | 46.25 | 16.25 | 80  |
|              | 3                              | 26.67  | 51.52 | 21.82 | 165 | 41.38 | 42.24 | 16.38 | 116 |
|              | 4                              | 30.26  | 44.62 | 25.13 | 195 | 30.40 | 48.80 | 20.80 | 125 |
|              | 5                              | 27.27  | 49.28 | 23.44 | 209 | 33.08 | 46.62 | 20.30 | 133 |
|              | 6                              | 28.91  | 48.34 | 22.75 | 211 | 29.92 | 51.18 | 18.90 | 127 |
|              | 7                              | 34.31  | 47.06 | 18.63 | 204 | 32.30 | 40.99 | 26.71 | 161 |
|              | 8                              | 27.01  | 49.29 | 23.70 | 211 | 29.93 | 50.34 | 19.73 | 147 |

|              |    |       |       |       |     |       |       |       |     |
|--------------|----|-------|-------|-------|-----|-------|-------|-------|-----|
|              | 9  | 26.70 | 50.79 | 22.51 | 191 | 21.83 | 49.30 | 28.87 | 142 |
|              | 10 | 18.93 | 50.89 | 30.18 | 169 | 17.01 | 44.90 | 38.10 | 147 |
|              | 11 | 26.87 | 35.82 | 37.31 | 134 | 18.18 | 49.65 | 32.17 | 143 |
|              | 12 | 20.00 | 45.00 | 35.00 | 80  | 21.32 | 42.65 | 36.03 | 136 |
|              | 13 | 23.33 | 53.33 | 23.33 | 30  | 15.13 | 47.90 | 36.97 | 119 |
|              | 14 | 21.43 | 57.14 | 21.43 | 14  | 10.23 | 40.91 | 48.86 | 88  |
|              | 15 | 0.00  | 0.00  | 0.00  | 8   | 17.65 | 33.33 | 49.02 | 51  |
|              | 16 | 0.00  | 0.00  | 0.00  | 0   | 7.32  | 43.90 | 48.78 | 41  |
|              | 17 | 0.00  | 0.00  | 0.00  | 0   | 27.59 | 37.93 | 34.48 | 29  |
|              | 18 | 0.00  | 0.00  | 0.00  | 0   | 23.81 | 47.62 | 28.57 | 21  |
|              | 19 | 0.00  | 0.00  | 0.00  | 0   | 15.79 | 47.37 | 36.84 | 19  |
|              | 20 | 0.00  | 0.00  | 0.00  | 0   | 0.00  | 0.00  | 0.00  | 6   |
|              | 21 | 0.00  | 0.00  | 0.00  | 0   | 0.00  | 0.00  | 0.00  | 3   |
|              | 22 | 0.00  | 0.00  | 0.00  | 0   | 0.00  | 0.00  | 0.00  | 0   |
|              | 23 | 0.00  | 0.00  | 0.00  | 0   | 0.00  | 0.00  | 0.00  | 0   |
|              | 24 | 0.00  | 0.00  | 0.00  | 0   | 0.00  | 0.00  | 0.00  | 0   |
|              | 25 | 0.00  | 0.00  | 0.00  | 0   | 0.00  | 0.00  | 0.00  | 0   |
| <i>daf-2</i> | 1  | 26.44 | 51.72 | 21.84 | 87  | 37.10 | 41.94 | 20.97 | 62  |
|              | 2  | 20.91 | 48.18 | 30.91 | 110 | 35.11 | 35.11 | 29.79 | 94  |
|              | 3  | 17.19 | 44.53 | 38.28 | 128 | 26.67 | 55.00 | 18.33 | 120 |
|              | 4  | 16.78 | 44.76 | 38.46 | 143 | 20.45 | 52.27 | 27.27 | 132 |
|              | 5  | 19.08 | 42.11 | 38.82 | 152 | 23.19 | 44.93 | 31.88 | 138 |
|              | 6  | 18.79 | 47.65 | 33.56 | 149 | 21.53 | 41.67 | 36.81 | 144 |
|              | 7  | 14.20 | 45.06 | 40.74 | 162 | 23.67 | 40.24 | 36.09 | 169 |
|              | 8  | 23.17 | 43.29 | 33.54 | 164 | 25.00 | 48.17 | 26.83 | 164 |
|              | 9  | 26.38 | 44.79 | 28.83 | 163 | 19.35 | 42.58 | 38.06 | 155 |
|              | 10 | 19.43 | 46.86 | 33.71 | 175 | 20.13 | 40.26 | 39.61 | 154 |
|              | 11 | 18.86 | 40.00 | 41.14 | 175 | 15.13 | 49.34 | 35.53 | 152 |
|              | 12 | 19.05 | 43.45 | 37.50 | 168 | 17.58 | 46.06 | 36.36 | 165 |
|              | 13 | 18.71 | 38.06 | 43.23 | 155 | 23.78 | 46.34 | 29.88 | 164 |
|              | 14 | 18.88 | 45.45 | 35.66 | 143 | 12.50 | 49.31 | 38.19 | 144 |
|              | 15 | 21.62 | 49.55 | 28.83 | 111 | 12.31 | 44.62 | 43.08 | 130 |
|              | 16 | 28.42 | 26.32 | 45.26 | 95  | 17.74 | 47.58 | 34.68 | 124 |
|              | 17 | 13.43 | 37.31 | 49.25 | 67  | 12.50 | 44.23 | 43.27 | 104 |
|              | 18 | 25.49 | 27.45 | 47.06 | 51  | 13.51 | 48.65 | 37.84 | 74  |
|              | 19 | 16.67 | 45.24 | 38.10 | 42  | 22.73 | 45.45 | 31.82 | 44  |
|              | 20 | 24.14 | 37.93 | 37.93 | 29  | 16.67 | 36.67 | 46.67 | 30  |
|              | 21 | 0.00  | 0.00  | 0.00  | 9   | 33.33 | 23.81 | 42.86 | 21  |
|              | 22 | 0.00  | 0.00  | 0.00  | 8   | 42.86 | 28.57 | 28.57 | 14  |
|              | 23 | 0.00  | 0.00  | 0.00  | 1   | 14.29 | 28.57 | 57.14 | 14  |
|              | 24 | 0.00  | 0.00  | 0.00  | 0   | 27.27 | 27.27 | 45.45 | 11  |

|              |    |       |       |       |     |       |       |       |     |
|--------------|----|-------|-------|-------|-----|-------|-------|-------|-----|
|              | 25 | 0.00  | 0.00  | 0.00  | 0   | 0.00  | 0.00  | 0.00  | 7   |
| <i>rsk-1</i> | 1  | 8.82  | 35.29 | 55.88 | 34  | 40.82 | 32.65 | 26.53 | 117 |
|              | 2  | 17.74 | 33.87 | 48.39 | 62  | 35.09 | 43.86 | 21.05 | 152 |
|              | 3  | 23.17 | 37.80 | 39.02 | 82  | 44.64 | 26.79 | 28.57 | 191 |
|              | 4  | 33.68 | 27.37 | 38.95 | 95  | 33.33 | 41.67 | 25.00 | 213 |
|              | 5  | 23.47 | 36.73 | 39.80 | 98  | 17.86 | 53.57 | 28.57 | 232 |
|              | 6  | 20.79 | 34.65 | 44.55 | 101 | 24.64 | 49.28 | 26.09 | 236 |
|              | 7  | 17.95 | 43.59 | 38.46 | 117 | 26.39 | 52.78 | 20.83 | 261 |
|              | 8  | 20.91 | 41.82 | 37.27 | 110 | 22.39 | 56.72 | 20.90 | 243 |
|              | 9  | 25.23 | 33.33 | 41.44 | 111 | 26.67 | 46.67 | 26.67 | 275 |
|              | 10 | 25.89 | 32.14 | 41.96 | 112 | 31.58 | 40.79 | 27.63 | 255 |
|              | 11 | 23.01 | 44.25 | 32.74 | 113 | 30.00 | 51.43 | 18.57 | 243 |
|              | 12 | 20.00 | 36.52 | 43.48 | 115 | 29.69 | 37.50 | 32.81 | 203 |
|              | 13 | 19.05 | 29.52 | 51.43 | 105 | 27.91 | 37.21 | 34.88 | 190 |
|              | 14 | 25.23 | 38.32 | 36.45 | 107 | 27.27 | 40.91 | 31.82 | 126 |
|              | 15 | 21.88 | 33.33 | 44.79 | 96  | 24.32 | 37.84 | 37.84 | 81  |
|              | 16 | 23.60 | 28.09 | 48.31 | 89  | 23.53 | 41.18 | 35.29 | 66  |
|              | 17 | 27.08 | 25.00 | 47.92 | 48  | 36.36 | 36.36 | 27.27 | 44  |
|              | 18 | 26.67 | 33.33 | 40.00 | 30  | 45.45 | 45.45 | 9.09  | 24  |
|              | 19 | 13.64 | 45.45 | 40.91 | 22  | 0.00  | 0.00  | 0.00  | 5   |
|              | 20 | 27.27 | 18.18 | 54.55 | 11  | 0.00  | 0.00  | 0.00  | 0   |
|              | 21 | 0.00  | 0.00  | 0.00  | 7   | 0.00  | 0.00  | 0.00  | 0   |
|              | 22 | 0.00  | 0.00  | 0.00  | 2   | 0.00  | 0.00  | 0.00  | 0   |
|              | 23 | 0.00  | 0.00  | 0.00  | 0   | 0.00  | 0.00  | 0.00  | 0   |
|              | 24 | 0.00  | 0.00  | 0.00  | 0   | 0.00  | 0.00  | 0.00  | 0   |
|              | 25 | 0.00  | 0.00  | 0.00  | 0   | 0.00  | 0.00  | 0.00  | 0   |

Table S3: Proportions of nuclei with Low, Mid and High DNA Content, averaged per animal per CD

|              |                                | Larval |        |       | Adult |       |       |
|--------------|--------------------------------|--------|--------|-------|-------|-------|-------|
| Genotype     | Distance in CD from distal tip | Low    | Mid    | High  | Low   | Mid   | High  |
| wild type    | 1                              | 33.33  | 51.85  | 14.81 | 30.77 | 57.69 | 11.54 |
|              | 2                              | 33.33  | 48.15  | 18.52 | 34.62 | 50.00 | 15.38 |
|              | 3                              | 34.62  | 46.15  | 19.23 | 30.77 | 61.54 | 7.69  |
|              | 4                              | 22.22  | 51.85  | 25.93 | 8.00  | 76.00 | 16.00 |
|              | 5                              | 11.11  | 62.96  | 25.93 | 24.00 | 76.00 | 0.00  |
|              | 6                              | 23.08  | 57.69  | 19.23 | 0.00  | 88.46 | 11.54 |
|              | 7                              | 22.22  | 59.26  | 18.52 | 4.17  | 70.83 | 25.00 |
|              | 8                              | 15.38  | 80.77  | 3.85  | 3.85  | 65.38 | 30.77 |
|              | 9                              | 23.08  | 69.23  | 7.69  | 12.00 | 60.00 | 28.00 |
|              | 10                             | 15.38  | 69.23  | 15.38 | 7.69  | 69.23 | 23.08 |
|              | 11                             | 20.83  | 66.67  | 12.50 | 3.85  | 69.23 | 26.92 |
|              | 12                             | 13.64  | 72.73  | 13.64 | 25.00 | 62.50 | 12.50 |
|              | 13                             | 0.00   | 82.35  | 17.65 | 4.00  | 72.00 | 24.00 |
|              | 14                             | 6.25   | 56.25  | 37.50 | 0.00  | 82.61 | 17.39 |
|              | 15                             | 20.00  | 46.67  | 33.33 | 9.09  | 59.09 | 31.82 |
|              | 16                             | 16.67  | 58.33  | 25.00 | 5.26  | 52.63 | 42.11 |
|              | 17                             | 22.22  | 44.44  | 33.33 | 5.26  | 63.16 | 31.58 |
|              | 18                             | 33.33  | 50.00  | 16.67 | 0.00  | 71.43 | 28.57 |
|              | 19                             | 25.00  | 75.00  | 0.00  | 7.14  | 64.29 | 28.57 |
|              | 20                             | 50.00  | 25.00  | 25.00 | 8.33  | 50.00 | 41.67 |
|              | 21                             | 0.00   | 100.00 | 0.00  | 0.00  | 41.67 | 58.33 |
|              | 22                             | 33.33  | 33.33  | 33.33 | 0.00  | 85.71 | 14.29 |
|              | 23                             | 0.00   | 100.00 | 0.00  | 0.00  | 33.33 | 66.67 |
|              | 24                             | 0.00   | 0.00   | 0.00  | 0.00  | 16.67 | 83.33 |
|              | 25                             | 0.00   | 0.00   | 0.00  | 0.00  | 25.00 | 75.00 |
| <i>glp-1</i> | 1                              | 33.93  | 55.36  | 10.71 | 44.12 | 32.35 | 23.53 |
|              | 2                              | 19.64  | 57.14  | 23.21 | 31.25 | 53.13 | 15.63 |
|              | 3                              | 23.64  | 58.18  | 18.18 | 29.41 | 67.65 | 2.94  |
|              | 4                              | 19.64  | 66.07  | 14.29 | 17.65 | 70.59 | 11.76 |
|              | 5                              | 19.64  | 71.43  | 8.93  | 18.18 | 72.73 | 9.09  |
|              | 6                              | 20.00  | 63.64  | 16.36 | 21.21 | 63.64 | 15.15 |
|              | 7                              | 18.52  | 68.52  | 12.96 | 17.65 | 76.47 | 5.88  |
|              | 8                              | 13.73  | 74.51  | 11.76 | 11.76 | 73.53 | 14.71 |
|              | 9                              | 10.87  | 80.43  | 8.70  | 8.82  | 73.53 | 17.65 |

|              |    |       |        |       |       |        |        |
|--------------|----|-------|--------|-------|-------|--------|--------|
|              | 10 | 10.00 | 75.00  | 15.00 | 2.94  | 76.47  | 20.59  |
|              | 11 | 8.57  | 60.00  | 31.43 | 3.13  | 75.00  | 21.88  |
|              | 12 | 4.17  | 62.50  | 33.33 | 6.25  | 71.88  | 21.88  |
|              | 13 | 8.33  | 83.33  | 8.33  | 6.45  | 54.84  | 38.71  |
|              | 14 | 25.00 | 75.00  | 0.00  | 0.00  | 53.85  | 46.15  |
|              | 15 | 0.00  | 100.00 | 0.00  | 5.56  | 44.44  | 50.00  |
|              | 16 | 0.00  | 0.00   | 0.00  | 7.69  | 30.77  | 61.54  |
|              | 17 | 0.00  | 0.00   | 0.00  | 0.00  | 66.67  | 33.33  |
|              | 18 | 0.00  | 0.00   | 0.00  | 0.00  | 50.00  | 50.00  |
|              | 19 | 0.00  | 0.00   | 0.00  | 0.00  | 80.00  | 20.00  |
|              | 20 | 0.00  | 0.00   | 0.00  | 0.00  | 0.00   | 100.00 |
|              | 21 | 0.00  | 0.00   | 0.00  | 0.00  | 0.00   | 100.00 |
|              | 22 | 0.00  | 0.00   | 0.00  | 0.00  | 0.00   | 0.00   |
|              | 23 | 0.00  | 0.00   | 0.00  | 0.00  | 0.00   | 0.00   |
|              | 24 | 0.00  | 0.00   | 0.00  | 0.00  | 0.00   | 0.00   |
|              | 25 | 0.00  | 0.00   | 0.00  | 0.00  | 0.00   | 0.00   |
| <i>daf-2</i> | 1  | 27.27 | 56.82  | 15.91 | 36.36 | 54.55  | 9.09   |
|              | 2  | 16.28 | 58.14  | 25.58 | 21.88 | 59.38  | 18.75  |
|              | 3  | 11.63 | 62.79  | 25.58 | 18.18 | 69.70  | 12.12  |
|              | 4  | 6.82  | 63.64  | 29.55 | 6.06  | 69.70  | 24.24  |
|              | 5  | 6.98  | 60.47  | 32.56 | 9.09  | 63.64  | 27.27  |
|              | 6  | 6.82  | 63.64  | 29.55 | 6.06  | 66.67  | 27.27  |
|              | 7  | 4.55  | 70.45  | 25.00 | 3.03  | 69.70  | 27.27  |
|              | 8  | 6.82  | 79.55  | 13.64 | 3.13  | 78.13  | 18.75  |
|              | 9  | 9.09  | 72.73  | 18.18 | 6.25  | 62.50  | 31.25  |
|              | 10 | 0.00  | 79.07  | 20.93 | 3.13  | 68.75  | 28.13  |
|              | 11 | 6.98  | 60.47  | 32.56 | 0.00  | 70.97  | 29.03  |
|              | 12 | 2.44  | 70.73  | 26.83 | 6.45  | 64.52  | 29.03  |
|              | 13 | 5.26  | 52.63  | 42.11 | 0.00  | 80.65  | 19.35  |
|              | 14 | 3.13  | 71.88  | 25.00 | 3.33  | 60.00  | 36.67  |
|              | 15 | 3.70  | 85.19  | 11.11 | 0.00  | 59.26  | 40.74  |
|              | 16 | 4.76  | 52.38  | 42.86 | 0.00  | 75.00  | 25.00  |
|              | 17 | 0.00  | 53.33  | 46.67 | 0.00  | 60.87  | 39.13  |
|              | 18 | 0.00  | 50.00  | 50.00 | 0.00  | 66.67  | 33.33  |
|              | 19 | 0.00  | 66.67  | 33.33 | 20.00 | 40.00  | 40.00  |
|              | 20 | 14.29 | 71.43  | 14.29 | 0.00  | 57.14  | 42.86  |
|              | 21 | 0.00  | 75.00  | 25.00 | 20.00 | 40.00  | 40.00  |
|              | 22 | 50.00 | 0.00   | 50.00 | 0.00  | 100.00 | 0.00   |
|              | 23 | 0.00  | 100.00 | 0.00  | 0.00  | 50.00  | 50.00  |
|              | 24 | 0.00  | 0.00   | 0.00  | 0.00  | 100.00 | 0.00   |
|              | 25 | 0.00  | 0.00   | 0.00  | 0.00  | 100.00 | 0.00   |

|               |    |       |       |       |       |       |       |
|---------------|----|-------|-------|-------|-------|-------|-------|
| <i>rsks-1</i> | 1  | 9.09  | 36.36 | 54.55 | 29.41 | 44.12 | 26.47 |
|               | 2  | 12.50 | 37.50 | 50.00 | 20.59 | 55.88 | 23.53 |
|               | 3  | 18.18 | 45.45 | 36.36 | 14.29 | 62.86 | 22.86 |
|               | 4  | 12.12 | 57.58 | 30.30 | 5.71  | 71.43 | 22.86 |
|               | 5  | 12.12 | 51.52 | 36.36 | 11.43 | 54.29 | 34.29 |
|               | 6  | 6.06  | 54.55 | 39.39 | 8.57  | 65.71 | 25.71 |
|               | 7  | 6.06  | 63.64 | 30.30 | 17.14 | 57.14 | 25.71 |
|               | 8  | 9.09  | 54.55 | 36.36 | 17.14 | 62.86 | 20.00 |
|               | 9  | 12.12 | 45.45 | 42.42 | 0.00  | 65.71 | 34.29 |
|               | 10 | 21.21 | 51.52 | 27.27 | 5.71  | 71.43 | 22.86 |
|               | 11 | 12.12 | 57.58 | 30.30 | 6.06  | 57.58 | 36.36 |
|               | 12 | 9.38  | 56.25 | 34.38 | 3.57  | 50.00 | 46.43 |
|               | 13 | 0.00  | 51.61 | 48.39 | 3.70  | 51.85 | 44.44 |
|               | 14 | 15.15 | 54.55 | 30.30 | 5.00  | 65.00 | 30.00 |
|               | 15 | 10.34 | 41.38 | 48.28 | 0.00  | 41.67 | 58.33 |
|               | 16 | 14.81 | 40.74 | 44.44 | 0.00  | 50.00 | 50.00 |
|               | 17 | 16.67 | 44.44 | 38.89 | 0.00  | 37.50 | 62.50 |
|               | 18 | 26.67 | 33.33 | 40.00 | 20.00 | 0.00  | 80.00 |
|               | 19 | 10.00 | 40.00 | 50.00 | 0.00  | 50.00 | 50.00 |
|               | 20 | 33.33 | 0.00  | 66.67 | 0.00  | 0.00  | 0.00  |
|               | 21 | 0.00  | 50.00 | 50.00 | 0.00  | 0.00  | 0.00  |
|               | 22 | 0.00  | 50.00 | 50.00 | 0.00  | 0.00  | 0.00  |
|               | 23 | 0.00  | 0.00  | 0.00  | 0.00  | 0.00  | 0.00  |
|               | 24 | 0.00  | 0.00  | 0.00  | 0.00  | 0.00  | 0.00  |
|               | 25 | 0.00  | 0.00  | 0.00  | 0.00  | 0.00  | 0.00  |

Table S4: Summary of nuclei analyzed for DNA content in time course post-ARD

| CD<br>Position | 0 hr<br>(N=12) | 6 hr<br>(N=11) | 24 hr<br>(N=8) | 48 hr<br>(N=11) | 72 hr<br>(N=10) | 96 hr<br>(N=7) |
|----------------|----------------|----------------|----------------|-----------------|-----------------|----------------|
| 1              | 23             | 24             | 16             | 13              | 41              | 45             |
| 2              | 43             | 28             | 34             | 15              | 66              | 52             |
| 3              | 44             | 39             | 27             | 18              | 67              | 58             |
| 4              | 51             | 37             | 37             | 16              | 72              | 69             |
| 5              | 48             | 43             | 39             | 27              | 77              | 70             |
| 6              | 49             | 44             | 44             | 31              | 69              | 71             |
| 7              | 44             | 41             | 44             | 30              | 71              | 68             |
| 8              | 30             | 44             | 31             | 34              | 71              | 64             |
| 9              | 23             | 42             | 28             | 37              | 80              | 65             |
| 10             | 23             | 41             | 33             | 30              | 78              | 65             |
| 11             | 14             | 40             | 24             | 42              | 64              | 57             |
| 12             | 9              | 35             | 24             | 41              | 64              | 49             |
| 13             | 6              | 31             | 19             | 43              | 49              | 39             |
| 14             | 1              | 35             | 11             | 33              | 48              | 41             |
| 15             | 0              | 17             | 8              | 30              | 38              | 37             |
| 16             | 0              | 18             | 6              | 16              | 29              | 37             |
| 17             | 0              | 10             | 2              | 6               | 21              | 27             |
| 18             | 0              | 7              | 0              | 3               | 11              | 29             |
| 19             | 0              | 1              | 0              | 7               | 5               | 24             |
| 20             | 0              | 1              | 0              | 7               | 0               | 5              |
| 21             | 0              | 1              | 0              | 5               | 0               | 0              |
| 22             | 0              | 0              | 0              | 2               | 0               | 0              |
| 23             | 0              | 0              | 0              | 0               | 0               | 0              |
| 24             | 0              | 0              | 0              | 0               | 0               | 0              |
| 25             | 0              | 0              | 0              | 0               | 0               | 0              |
| Total (n)      | 408            | 579            | 427            | 486             | 1021            | 972            |

N = number of animals

n = number of nuclei

Table S5: Proportions of nuclei with Low, Mid and High DNA Content, averaged per animal per CD

| Post-ARD Hours Re-fed | Distance in CD from distal tip | N  | Low   | Mid    | High  |
|-----------------------|--------------------------------|----|-------|--------|-------|
| 0                     | ≤5                             | 12 | 0.00  | 66.67  | 33.33 |
|                       | 6 to 10                        | 12 | 0.00  | 33.33  | 66.67 |
|                       | 11 to 15                       | 3  | 0.00  | 33.33  | 66.67 |
|                       | >15                            | 0  | 0.00  | 0.00   | 0.00  |
| 6                     | ≤5                             | 11 | 0.00  | 63.64  | 36.36 |
|                       | 6 to 10                        | 11 | 0.00  | 54.55  | 45.45 |
|                       | 11 to 15                       | 10 | 0.00  | 40.00  | 60.00 |
|                       | >15                            | 5  | 20.00 | 40.00  | 40.00 |
| 24                    | ≤5                             | 8  | 0.00  | 75.00  | 25.00 |
|                       | 6 to 10                        | 8  | 0.00  | 62.50  | 37.50 |
|                       | 11 to 15                       | 7  | 0.00  | 57.14  | 42.86 |
|                       | >15                            | 1  | 0.00  | 100.00 | 0.00  |
| 48                    | ≤5                             | 11 | 9.09  | 72.73  | 18.18 |
|                       | 6 to 10                        | 11 | 9.09  | 72.73  | 18.18 |
|                       | 11 to 15                       | 10 | 10.00 | 50.00  | 40.00 |
|                       | >15                            | 5  | 20.00 | 40.00  | 40.00 |
| 72                    | ≤5                             | 10 | 0.00  | 70.00  | 30.00 |
|                       | 6 to 10                        | 10 | 10.00 | 60.00  | 30.00 |
|                       | 11 to 15                       | 10 | 10.00 | 60.00  | 30.00 |
|                       | >15                            | 5  | 0.00  | 40.00  | 60.00 |
| 96                    | ≤5                             | 7  | 14.29 | 71.43  | 14.29 |
|                       | 6 to 10                        | 7  | 14.29 | 71.43  | 14.29 |
|                       | 11 to 15                       | 7  | 42.86 | 57.14  | 0.00  |
|                       | >15                            | 5  | 0.00  | 80.00  | 20.00 |

N = number of animals

Table S6: Proportions of nuclei with Low, Mid and High DNA content, averaged per animal per CD

| Genotype     | Distance in CD from distal tip | Larval |       |       |       | Adult |       |       |       |
|--------------|--------------------------------|--------|-------|-------|-------|-------|-------|-------|-------|
|              |                                | N      | Low   | Mid   | High  | N     | Low   | Mid   | High  |
| wild type    | ≤5                             | 27     | 22.22 | 62.96 | 14.81 | 26    | 23.08 | 73.08 | 3.85  |
|              | 6 to 10                        | 27     | 7.41  | 85.19 | 7.41  | 26    | 3.85  | 84.62 | 11.54 |
|              | 11 to 15                       | 24     | 8.33  | 83.33 | 8.33  | 26    | 3.85  | 80.77 | 15.38 |
|              | >15                            | 12     | 16.67 | 66.67 | 16.67 | 19    | 0.00  | 63.16 | 36.84 |
| <i>glp-1</i> | ≤5                             | 56     | 14.29 | 80.36 | 5.36  | 34    | 17.65 | 76.47 | 5.88  |
|              | 6 to 10                        | 55     | 5.45  | 87.27 | 7.27  | 34    | 2.94  | 88.24 | 8.82  |
|              | 11 to 15                       | 35     | 5.71  | 68.57 | 25.71 | 32    | 0.00  | 75.00 | 25.00 |
|              | >15                            | 0      | 0.00  | 0.00  | 0.00  | 13    | 0.00  | 53.85 | 46.15 |
| <i>daf-2</i> | ≤5                             | 44     | 6.82  | 70.45 | 22.73 | 33    | 9.09  | 78.79 | 12.12 |
|              | 6 to 10                        | 44     | 0.00  | 88.64 | 11.36 | 33    | 3.03  | 78.79 | 18.18 |
|              | 11 to 15                       | 44     | 2.27  | 77.27 | 20.45 | 31    | 0.00  | 64.52 | 35.48 |
|              | >15                            | 21     | 4.76  | 57.14 | 38.10 | 24    | 0.00  | 75.00 | 25.00 |
| <i>rsk-1</i> | ≤5                             | 33     | 12.12 | 51.52 | 36.36 | 35    | 8.57  | 68.57 | 22.86 |
|              | 6 to 10                        | 33     | 6.06  | 60.61 | 33.33 | 35    | 5.71  | 74.29 | 20.00 |
|              | 11 to 15                       | 33     | 0.00  | 72.73 | 27.27 | 33    | 0.00  | 60.61 | 39.39 |
|              | >15                            | 28     | 10.71 | 46.43 | 42.86 | 8     | 0.00  | 37.50 | 62.50 |

N = number of animals

Table S7: Odds ratios and p-values for DNA content of nuclei in regions “CD 6 to 10, 11 to 15, and >15” relative to region “CD ≤ 5” separated by age and genotype

| Model |               |        |            | Distance in CD from the distal tip |         |          |         |
|-------|---------------|--------|------------|------------------------------------|---------|----------|---------|
| Group | Genotype      | Age    |            | ≤5                                 | 6 to10  | 11 to 15 | >15     |
| 1     | wild type     | Larval | Odds Ratio | 1                                  | 0.89    | 1.04     | 0.98    |
|       |               |        | p-value    | ref                                | 0.389   | 0.783    | 0.943   |
|       |               | Adult  | Odds Ratio | 1                                  | 1.95    | 2.06     | 3.43    |
|       |               |        | p-value    | ref                                | <0.0001 | <0.0001  | <0.0001 |
| 3     | <i>glp-1</i>  | Larval | Odds Ratio | 1                                  | 1.11    | 1.95     | na      |
|       |               |        | p-value    | ref                                | 0.319   | <0.0001  | na      |
|       |               | Adult  | Odds Ratio | 1                                  | 1.51    | 2.61     | 3.75    |
|       |               |        | p-value    | ref                                | <0.0001 | <0.0001  | <0.0001 |
| 5     | <i>daf-2</i>  | Larval | Odds Ratio | 1                                  | 0.98    | 1.13     | 1.66    |
|       |               |        | p-value    | ref                                | 0.82    | 0.298    | 0.006   |
|       |               | Adult  | Odds Ratio | 1                                  | 1.45    | 1.78     | 2.18    |
|       |               |        | p-value    | ref                                | 0.001   | <0.0001  | <0.0001 |
| 7     | <i>rsks-1</i> | Larval | Odds Ratio | 1                                  | 0.97    | 0.99     | 1.07    |
|       |               |        | p-value    | ref                                | 0.851   | 0.951    | 0.768   |
|       |               | Adult  | Odds Ratio | 1                                  | 0.93    | 1.5      | 2.24    |
|       |               |        | p-value    | ref                                | 0.438   | 0.002    | 0.002   |

Table S8: Odd ratios and 95% confidence interval (CI) comparing DNA content of germ cells upon post-ARD re-feeding

|             |          | Odds Ratio | 95% CI    |
|-------------|----------|------------|-----------|
| CD position | ≤5       | 1          |           |
|             | 6 to 10  | 1.04       | 0.90-1.21 |
|             | 11 to 15 | 1.22       | 0.99-1.49 |
|             | >15      | 2.39       | 1.63-3.38 |
| Hours       | 0        | 1          |           |
|             | 6        | 0.79       | 0.42-1.51 |
|             | 24       | 0.94       | 0.47-1.88 |
|             | 48       | 0.45       | 0.24-0.85 |
|             | 72       | 0.56       | 0.30-1.06 |
|             | 96       | 0.36       | 0.18-0.74 |
